# Supplementary material
Source: publisher site journal article supplement (https://www.spandidos-publications.com/8460/downloadSupplementary)
Supplement: Supplementary file 1 [file downloadSupplementary]

Table S1. Univariate analysis of baseline confounding factors and postoperative outcomes.

| Baseline factor and outcome          | Test statistic | P-value |
|--------------------------------------|----------------|---------|
| BMI (continuous, kg/m <sup>2</sup> ) |                |         |
| Incision site sclerosis              | t=0.87         | 0.386   |
| Pain at surgical site                | t=1.21         | 0.229   |
| Skin indentation                     | t=0.54         | 0.59    |
| Symptomatic seroma/hematoma          | t=0.33         | 0.742   |
| Delayed incision healing             | t=0.91         | 0.365   |
| Fat necrosis                         | t=1.02         | 0.31    |
| Incision infection                   | t=0.76         | 0.449   |
| Satisfaction with breasts            | r=-0.08        | 0.453   |
| Psychosocial well-being              | r=0.12         | 0.256   |
| Chest physical well-being            | r=-0.05        | 0.639   |
| Diabetes (yes vs. no)                |                |         |
| Incision site sclerosis              | $\chi^2=0.23$  | 0.631   |
| Pain at surgical site                | $\chi^2=1.54$  | 0.215   |
| Skin indentation                     | $\chi^2=0.08$  | 0.777   |
| Symptomatic seroma/hematoma          | $\chi^2=0.01$  | 0.919   |
| Delayed incision healing             | $\chi^2=1.89$  | 0.169   |
| Fat necrosis                         | $\chi^2=0.45$  | 0.502   |
| Incision infection                   | $\chi^2=0.67$  | 0.413   |
| Satisfaction with breasts            | t=0.92         | 0.36    |
| Psychosocial well-being              | t=0.54         | 0.59    |
| Chest physical well-being            | t=0.38         | 0.705   |
| Hypertension (yes vs. no)            |                |         |
| Incision site sclerosis              | $\chi^2=0.02$  | 0.888   |
| Pain at surgical site                | $\chi^2=0.47$  | 0.493   |
| Skin indentation                     | $\chi^2=1.12$  | 0.29    |
| Symptomatic seroma/hematoma          | $\chi^2=2.34$  | 0.126   |
| Delayed incision healing             | $\chi^2=0.18$  | 0.671   |
| Fat necrosis                         | $\chi^2=0.91$  | 0.34    |
| Incision infection                   | $\chi^2=0.01$  | 0.919   |
| Satisfaction with breasts            | t=0.21         | 0.834   |
| Psychosocial well-being              | t=1.07         | 0.287   |
| Chest physical well-being            | t=0.65         | 0.517   |
| Cardiovascular disease (yes vs. no)  |                |         |
| Incision site sclerosis              | Fisher's exact | 1       |
| Pain at surgical site                | Fisher's exact | 0.592   |
| Skin indentation                     | Fisher's exact | 0.619   |
| Symptomatic seroma/hematoma          | $\chi^2=0.21$  | 0.647   |
| Delayed incision healing             | Fisher's exact | 0.43    |
| Fat necrosis                         | Fisher's exact | 1       |
| Incision infection                   | Fisher's exact | 1       |
| Satisfaction with breasts            | t=0.67         | 0.506   |
| Psychosocial well-being              | t=0.89         | 0.378   |
| Chest physical well-being            | t=0.12         | 0.905   |

BMI, body mass index; t, independent samples t-test; r, Pearson correlation coefficient.

Table SII. BREAST-Q domain scores at 3 months after breast-conserving surgery with intraoperative radiotherapy (n=92).

| BREAST-Q domain           | Mean $\pm$ SD     |
|---------------------------|-------------------|
| Satisfaction with breasts | 54.69 $\pm$ 19.56 |
| Psychosocial well-being   | 64.37 $\pm$ 25.74 |
| Chest physical well-being | 60.99 $\pm$ 23.47 |

BREAST-Q, Breast-Quality of Life Questionnaire; SD, standard deviation.
